# Supplementary material for: Construction of a 3D aluminum flake framework with a sponge template to prepare thermally conductive polymer composites
Source: Royal Society of Chemistry journal article supplement (doi:10.1039/d0ta12541e), 2021-01-01
Supplement: d0ta12541e1.pdf [file d0ta12541e1.pdf]

## Electronic Supplementary Information (ESI)

Construction of 3D aluminum flake framework by sponge template  
to prepare thermally conductive polymer composites

*Baojie Wei, Xi Chen, Shuangqiao Yang\**

State Key Laboratory of Polymer Materials Engineering, Polymer Research Institute  
of Sichuan University, No.24 South Section 1, Yihuan Road, Chengdu 610065, China

\*Email of corresponding author: (E-mail: yangshuangqiao@126.com)

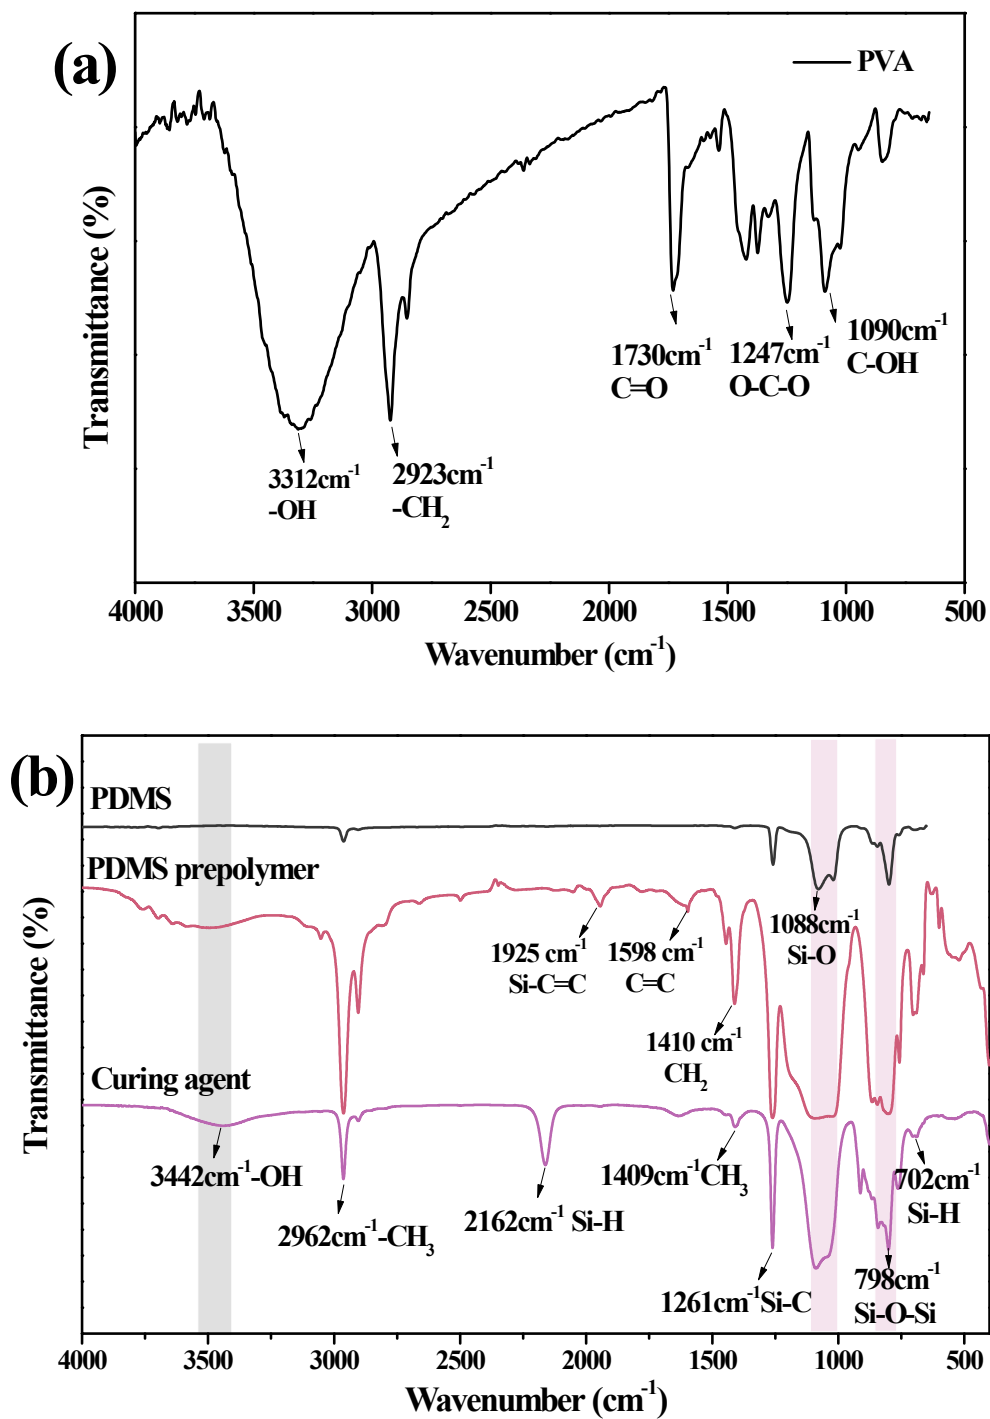

Fig.S1 FTIR spectra of PVA (a) and PDMS (b).

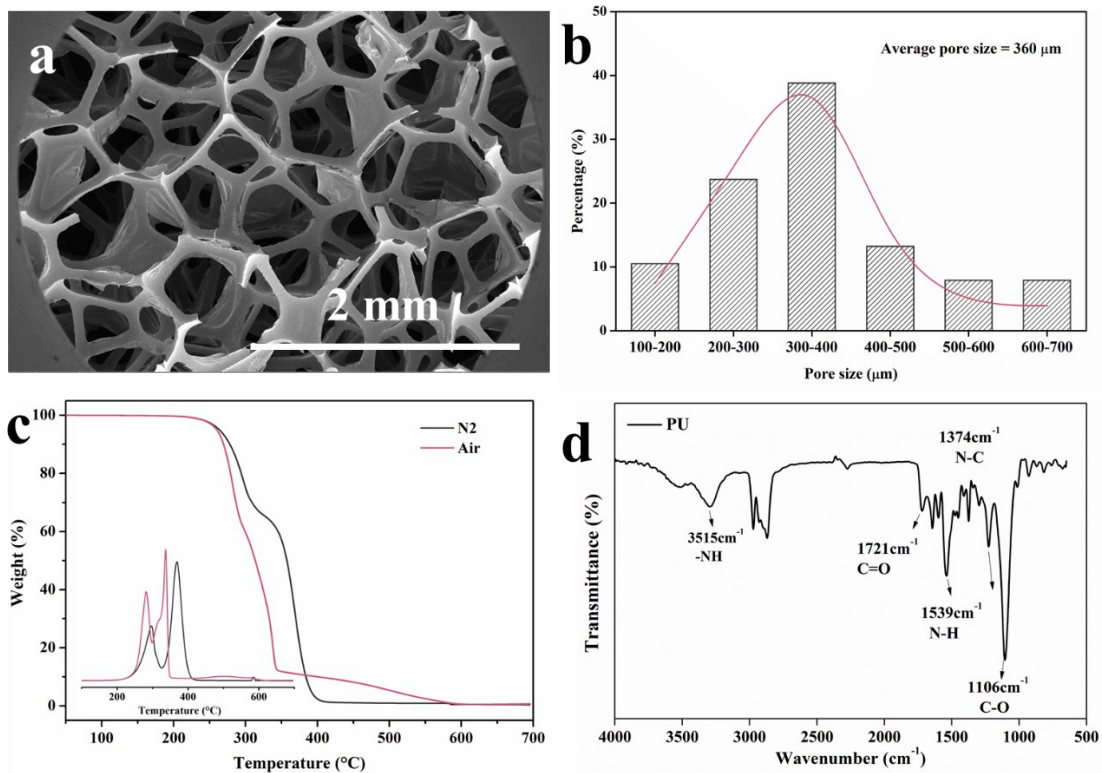

**Fig.S2** Characterization of the PU sponge. (a) SEM, (b) calculated pore size, (c) DTG and FTIR of PU sponge.

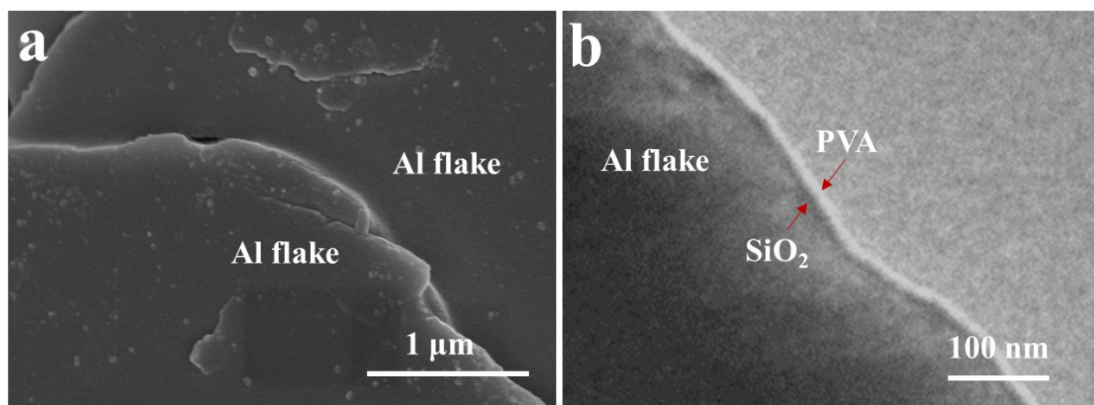

**Fig.S3** High resolution SEM (a) and TEM (b) morphology of Al nanoflake in the surface of PU sponge

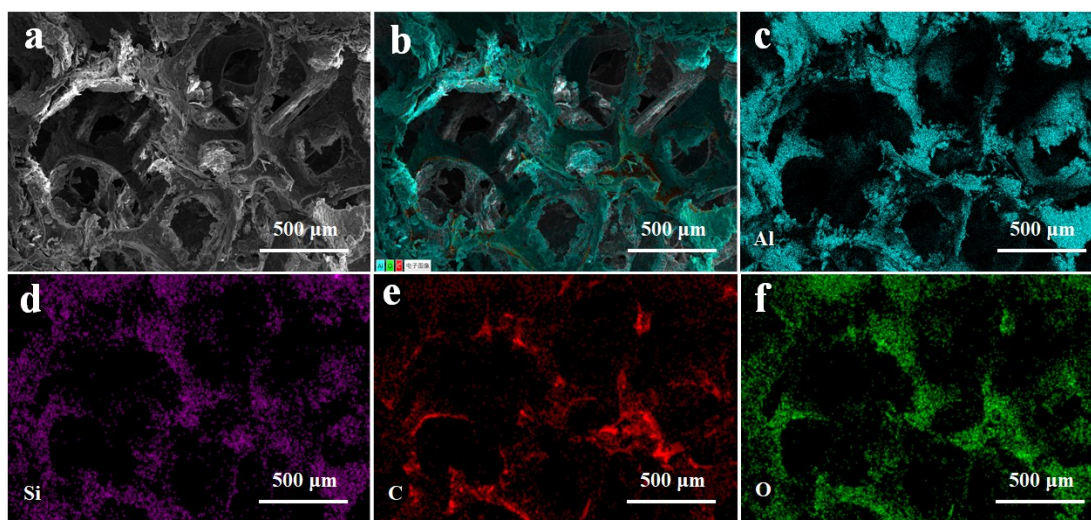

**Fig.S4** (a-b) Selected SEM area for PU@Al<sub>30</sub> and the corresponding element mapping image of (c) Al, (d) Si, (e) C, and (f) O.

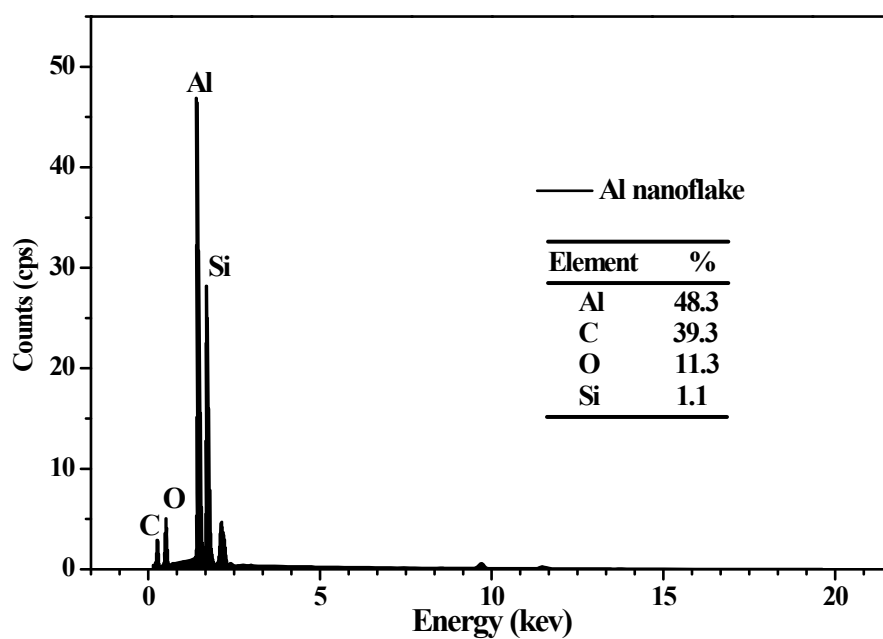

**Fig.S5** EDX analysis and element content in the surface of Al nanoflake.

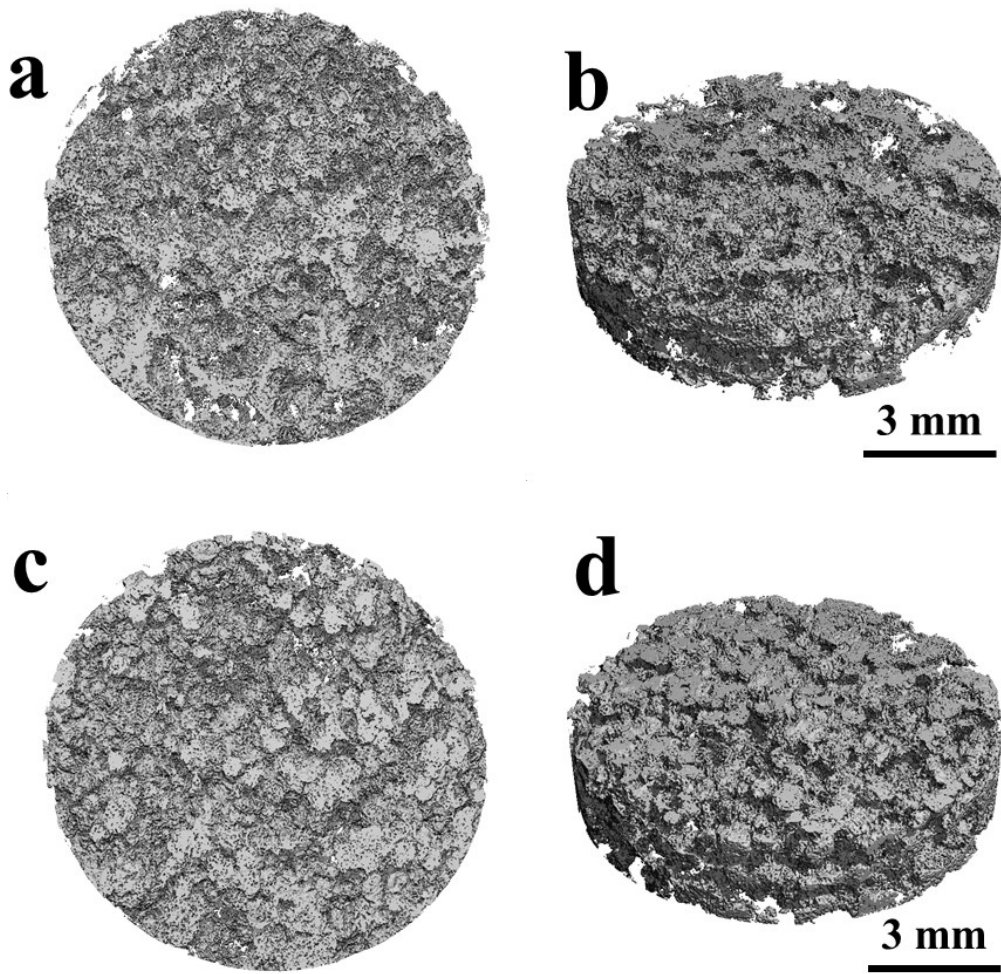

**Fig.S6** Micro CT images of the (a-b) PDMS/PU@Al<sub>15</sub> and (c-d) PDMS/PU@Al<sub>30</sub> composites.

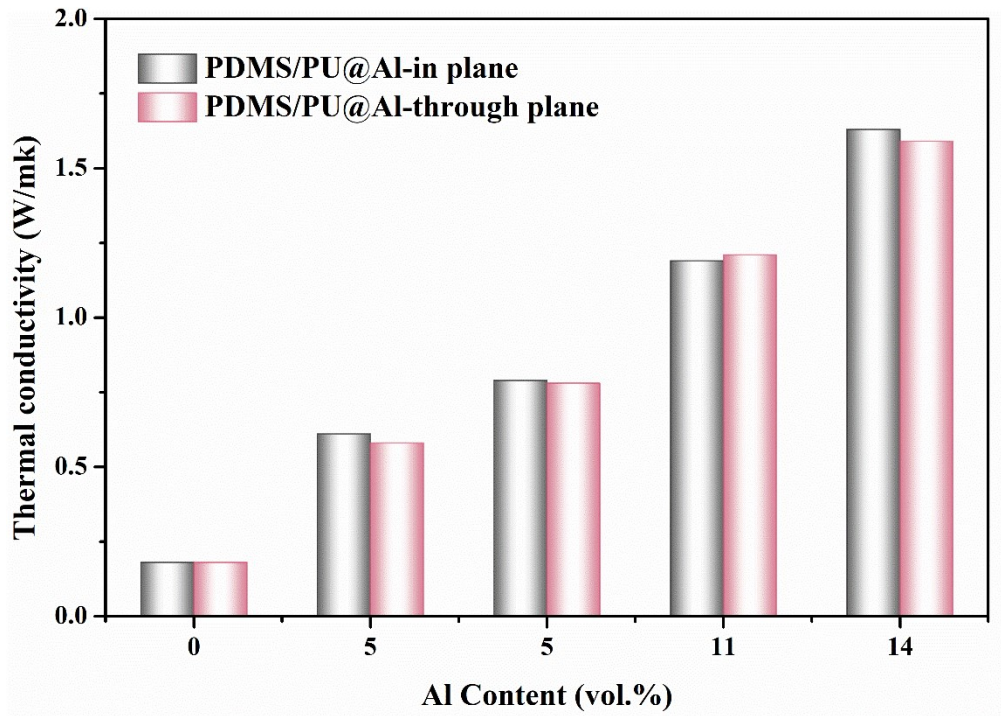

**Fig.S7** Thermal conductivity and of PDMS/PU@Al composites at in plane and through plane direction.



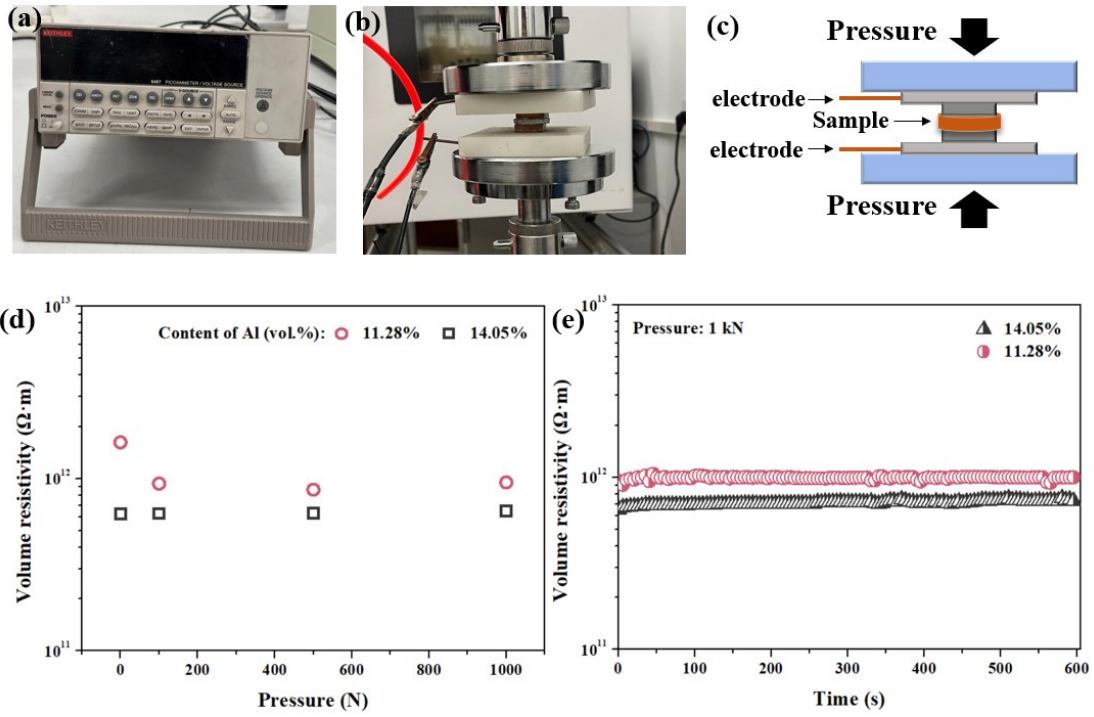

**Fig.S8** Keithley 6487 (a). Resistance measurement process under pressure (b) and the schematic diagram (c). Volume resistivity-pressure (d) and volume resistivity-time (e) curves of PDMS/PU@Al composites.

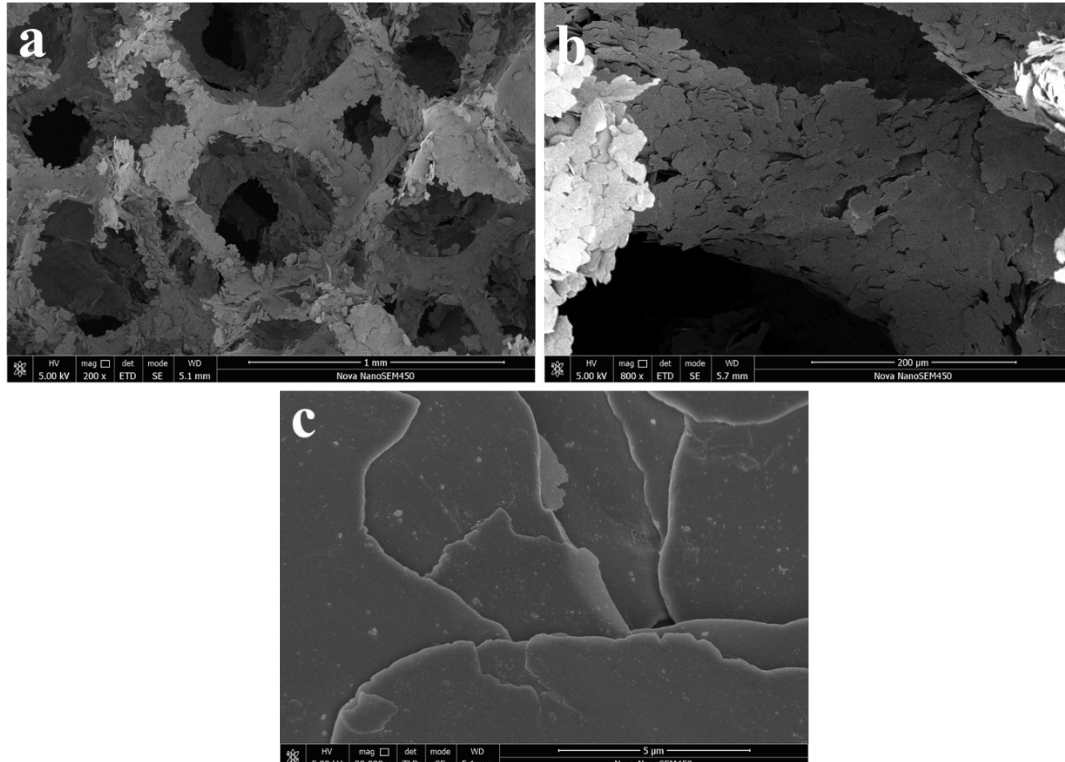

**Fig.S9** SEM images of PU@Al<sub>30</sub> sponge after compression with different magnification.

## Method.S1 Calculation of interfacial thermal resistances of PDMS/Al

To further investigate the thermal conductive mechanisms of PDMS/Al and PDMS/PU@Al composites, the interfacial thermal resistance (ITR) are simulated by the effective medium theory (EMT) and Foygel's theory, respectively (Figure.S1). As for the PDMS/Al composites, ITR can be calculated using the EMT model, because Al flakes are randomly dispersed and the content of fillers was below 40 wt.%. [1-3]

The EMT model is as follows:

$$K = K_m \frac{3 + \varphi(\beta_1 + \beta_2)}{3 - \varphi\beta_1}$$

with

$$\beta_1 = \frac{2[d(K_{Al} - K_m) - 2R_{c1}K_mK_{Al}]}{d(K_{Al} + K_m) + 2R_{c1}K_mK_{Al}}$$

$$\beta_2 = \frac{L(K_{Al} - K_m) - 2R_{c1}K_{Al}K_m}{LK_m + 2R_{c1}K_mK_{Al}}$$

Where  $K$ ,  $K_{Al}$ , and  $K_m$  are, respectively, the thermal conductivities of the composites, Al flakes (270 W/mK) and the pure PDMS (0.19 W/mK).  $\varphi$  is the volume fraction of the Al fillers, and  $d$  (80 nm) and  $L$  (15  $\mu$ m) represent the diameter and length of Al flakes. By fitting the thermal conductivities of PDMS/Al composites in fitting curves, the interfacial thermal resistance ( $R_{c1}$ ) between Al flakes and PDMS is  $3.16 \times 10^{-7}$  m<sup>2</sup>K/W.

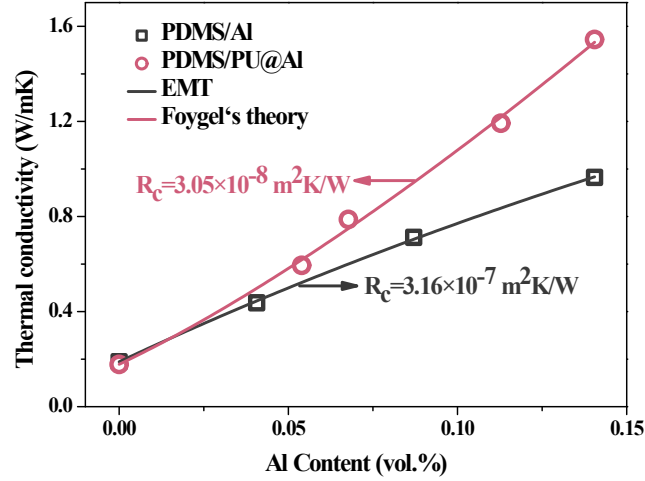

Fitting ITR results by EMT and Foygel's theory

## Method.S2 Calculation of interfacial thermal resistances of PDMS/PU@Al

Compared with PDMS/Al composites, Al flakes in PDMS/PU@Al composites are closely connected to each other, and the ITR between fillers becomes the most important factor in thermal conductivities in PDMS/PU@Al composites. Thus, the nonlinear Foygel's model is proposed to calculate the ITR in PDMS/PU@Al composites, which can be expressed as follows[2, 4, 5]:

$$K = K_0(\varphi - \varphi_c)^\tau$$

$$R_c = (K_0 L \varphi_c^\tau)^{-1}$$

Where  $K_0$  is a pre-exponential factor related to contact between Al flakes.  $\varphi_c$  is the critical volume fraction of Al flakes.  $\tau$  is a conductivity exponent connected with the aspect ratio of the Al flakes. By fitting the thermal conductivity of PDMS/PU@Al composites, the  $R_c$  is calculated as  $3.57 \times 10^5$  K/W. Considering the average overlap area between Al flakes, the ITR between Al flakes and PDMS can be obtained by the following equation:

$$R_{c2} = R_c \times \bar{A}_s$$

where

$$\bar{A}_s = \frac{2d^2}{\pi} \delta(p)$$

$$\delta(p) = \ln \left[ \frac{\sqrt{1+p^{-1}} + \sqrt{1-p^{-1}}}{\sqrt{1+p^{-1}} - \sqrt{1-p^{-1}}} \right]$$

$$p = \frac{L}{d}$$

The resultant  $R_{c2}$  of PDMS/PU@Al composites is  $3.05 \times 10^{-8} \text{ m}^2\text{K/W}$ .

**Table.S1** Major parameters used in the simulation

| <b>Parameters</b>                | <b>PU</b> | <b>Al</b> | <b>PDMS</b> |
|----------------------------------|-----------|-----------|-------------|
| Thermal conductivity (W/(m K))   | 0.25      | 219       | 0.16        |
| Specific heat capacity (J/(g K)) | 1380      | 880       | 270         |
| Density (kg/m <sup>3</sup> )     | 1250      | 2700      | 1030        |

## Reference

- (1) Zeng, X.; Sun, J.; Yao, Y.; Sun, R.; Xu, J.-B.; Wong, C.-P. A Combination of Boron Nitride Nanotubes and Cellulose Nanofibers for the Preparation of a Nanocomposite with High Thermal Conductivity. *ACS Nano* **2017**, *11* (5), 5167-5178, DOI: 10.1021/acsnano.7b02359.
- (2) Chen, J.; Wei, H.; Bao, H.; Jiang, P.; Huang, X. Millefeuille-Inspired Thermally Conductive Polymer Nanocomposites with Overlapping BN Nanosheets for Thermal Management Applications. *ACS Applied Materials & Interfaces* **2019**, *11* (34), 31402-31410, DOI: 10.1021/acsami.9b10810.
- (3) Nan, C.-W.; Liu, G.; Lin, Y.; Li, M. Interface effect on thermal conductivity of carbon nanotube composites. *Applied Physics Letters* **2004**, *85* (16), 3549-3551, DOI: 10.1063/1.1808874.
- (4) Ma, J.; Shang, T.; Ren, L.; Yao, Y.; Zhang, T.; Xie, J.; Zhang, B.; Zeng, X.; Sun, R.; Xu, J.-B.; Wong, C.-P. Through-plane assembly of carbon fibers into 3D skeleton achieving enhanced thermal conductivity of a thermal interface material. *Chemical Engineering Journal* **2020**, *380*, 122550, DOI: <https://doi.org/10.1016/j.cej.2019.122550>.
- (5) Ji, C.; Wang, Y.; Ye, Z.; Tan, L.; Mao, D.; Zhao, W.; Zeng, X.; Yan, C.; Sun, R.; Kang, D. J.; Xu, J.; Wong, C. Ice-Templated MXene/Ag-Epoxy Nanocomposites as High-Performance Thermal Management Materials. *ACS Applied Materials & Interfaces* **2020**, DOI: 10.1021/acsami.9b22744.
